# Supplementary material for: Computational identification of surface markers for isolating distinct subpopulations from heterogeneous cancer cell populations
Source: PubMed Central journal article supplement — NPJ Syst Biol Appl. 2024 Oct 17;10:120. doi: 10.1038/s41540-024-00441-6 (PMC11487074; doi:10.1038/s41540-024-00441-6), 2024-10-17
Supplement: 41540_2024_441_MOESM3_ESM.pdf [file 41540_2024_441_MOESM3_ESM.pdf]

# Computational identification of surface markers for isolating distinct subpopulations from heterogeneous cancer cell populations

## Supplementary Information

**Supplementary Data 1. EMD ranked list of genes for MDA-MB-231 clusters.** Output ranked candidate surface marker genes from EMD for MDA-MB-231 scRNA-seq clusters. [*emdGenesRankScore231.csv*]

**Supplementary Data 2. EMD ranked list of genes for MDA-MB-436 clusters.** Output ranked candidate surface marker genes from EMD for MDA-MB-436 scRNA-seq clusters. [*emdGenesRankScore436.csv*]

**Supplementary Table 1. Information on monoclonal antibodies screened on each cell line.**

| Cell Line | Gene    | Antibody Target Protein | Cluster | Fluorochrome | Supplier    | CatNo           |
|-----------|---------|-------------------------|---------|--------------|-------------|-----------------|
| mdamb231  | ESAM    | ESAM                    | 1       | FITC         | Miltenyi    | 130-115-039     |
| mdamb231  | ESAM    | ESAM                    | 1       | APC-Vio770   | Miltenyi    | 130-115-038     |
| mdamb231  | TSPAN8  | TSPAN8                  | 1       | PE           | Miltenyi    | 130-117-540     |
| mdamb231  | ITGA2   | CD49b                   | 1       | APC          | Miltenyi    | 130-100-328     |
| mdamb231  | SLC7A5  | LAT1                    | 0       | FITC         | R&D Systems | FAB10390G-100UG |
| mdamb231  | SLC7A5  | CD98                    | 0       | PE-Vio770    | Miltenyi    | 130-126-170     |
| mdamb231  | HLA-B   | HLA-ABC                 | 0       | PE-Vio615    | Miltenyi    | 130-130-114     |
| mdamb436  | BST2    | CD317/Tetherin          | 1       | APC          | Miltenyi    | 130-101-660     |
| mdamb436  | CA12    | CA12                    | 0       | FITC         | Abcam       | ab275576        |
| mdamb436  | GYPC    | GYPC                    | 1       | Dylite405    | Novus       | NBP2-33304V     |
| mdamb436  | IL13RA2 | CD213a2                 | 0       | PE           | Biolegend   | 360305          |

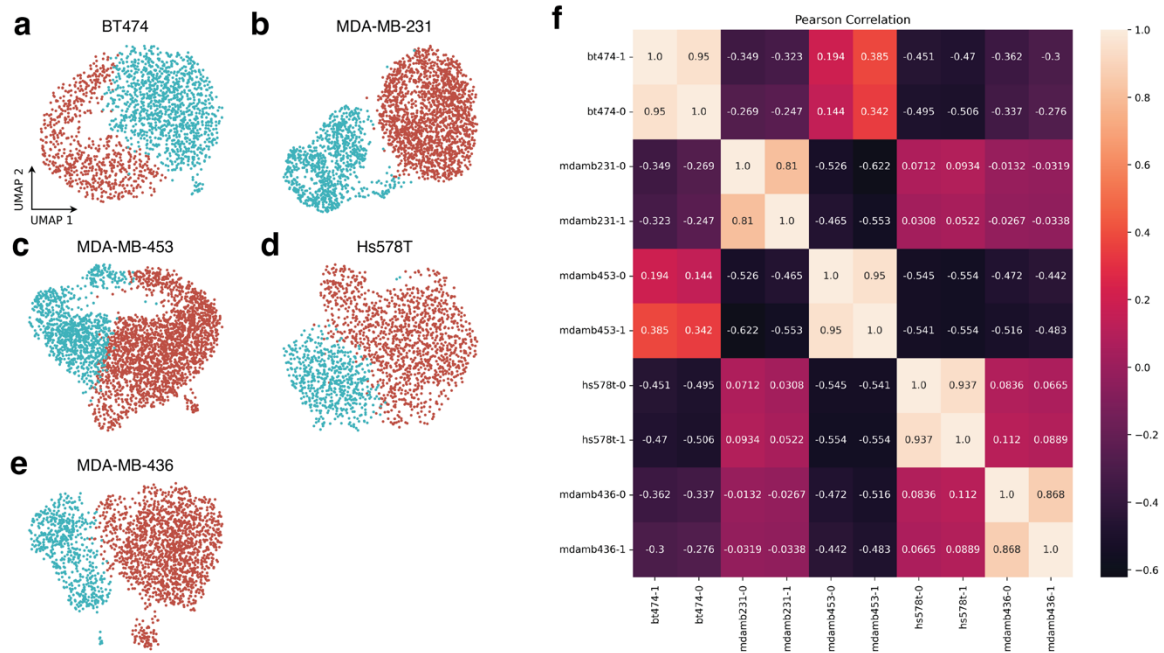

**Supplementary Figure 1. Clustering and cluster similarity within cell lines.** Clustered UMAPs for (a) BT-474, (b) MDA-MB-231, (c) MDA-MB-453, (d) Hs578T, and (e) MDA-MB-436. (f) Pearson correlation matrix showing similarity of clusters within and across cell lines.

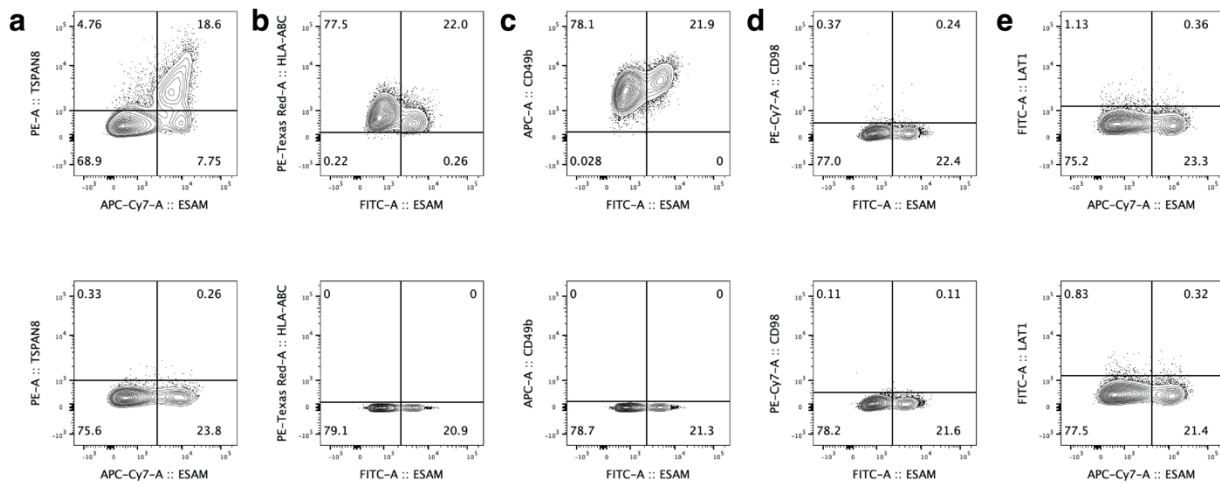

**Supplementary Figure 2. Screened antibodies on MDA-MB-231 cells shown as stained in tandem with surface marker, ESAM.** Top panel: double stained, Bottom panel: single ESAM-stained controls. (a) TSPAN8 stains a subset of ESAM-high cells, (b) HLA-ABC shows higher staining in a subset of ESAM-low cells, (c) ITGA2/CD49b shows higher staining in a subset of ESAM-high cells, (d) SLC7A5/CD98 did not surface stain, (e) SLC7A5/LAT1 did not surface stain.

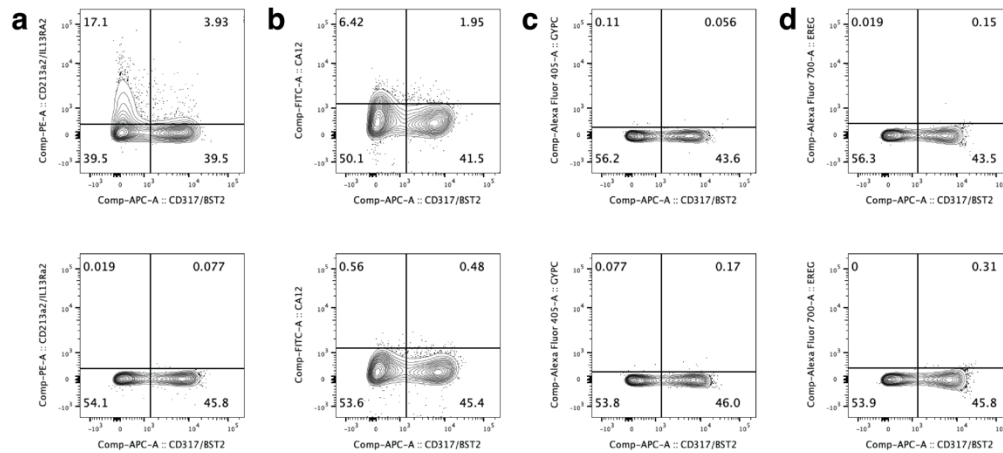

**Supplementary Figure 3. Screened antibodies on MDA-MB-436 cells shown as stained in tandem with surface marker, BST2/CD317/tetherin.** Top panel: double stained, Bottom panel: single BST2/CD317/tetherin-stained controls. (a) IL13Ra2/CD213a2 shows higher staining in a subset of BST2/tetherin-low, (b) CA12 shows higher staining in a small subset of BST2/tetherin-low cells, (c) GYPC did not surface stain, (d) EREG did not surface stain.
